# Supplementary material
Source: HighWire-hosted journal article supplement (https://openheart.bmj.com/content/10/1/e002224)
Supplement: inline-supplementary-material-1 [file inline-supplementary-material-1.pdf]

### Exploration of the impact of scoliosis on the heart in the UK Biobank

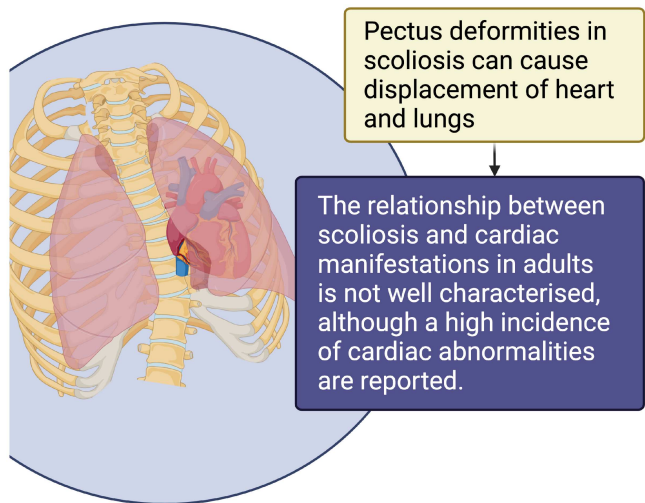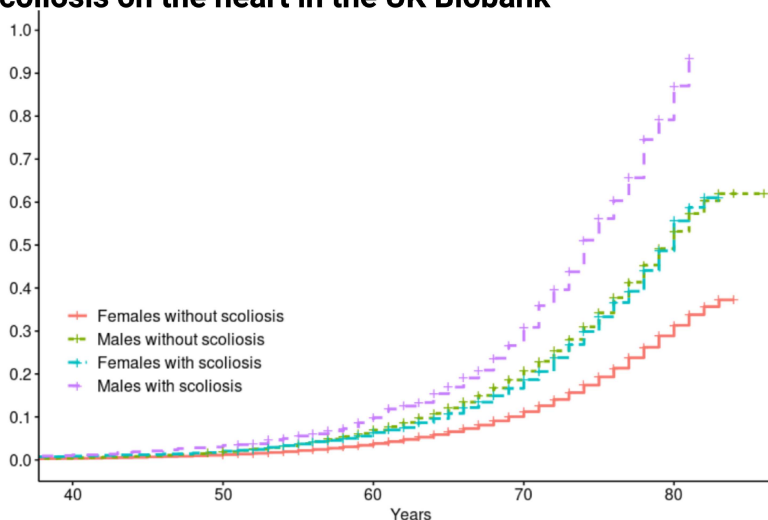

4,095 (1 in 120) participants have scoliosis in the UK Biobank with:  
 Increased risk of major adverse cardiovascular events (HR=1.63)  
 Mainly driven by heart failure (HR=1.58) and atrial fibrillation (HR=1.54)

#### Cardiac magnetic resonance imaging Diastole

No spinal curvature

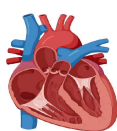

Scoliosis

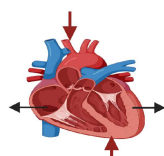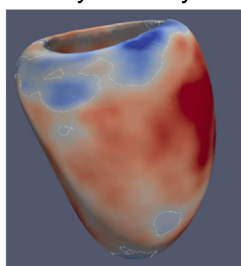

#### Surface to surface analysis

Identification of increased cardiac compression on the top and bottom of the heart, and radial cardiac decompression (sides of the heart) in scoliosis patients.

#### Conclusion:

This work identifies, in an adult population, the evidence for altered cardiac function and increased lifetime risk of MACE in participants with scoliosis.
